# Supplementary material for: Impacts of Cropping Systems on Glyphosate and Aminomethylphosphonic Acid Contents and Microbial Community in Field Crop Soils in Quebec (Canada)
Source: MDPI journal article supplement (doi:10.3390/agronomy14040686), 2024-03-27
Supplement: s1 [file s1]

Supplementary Materials:

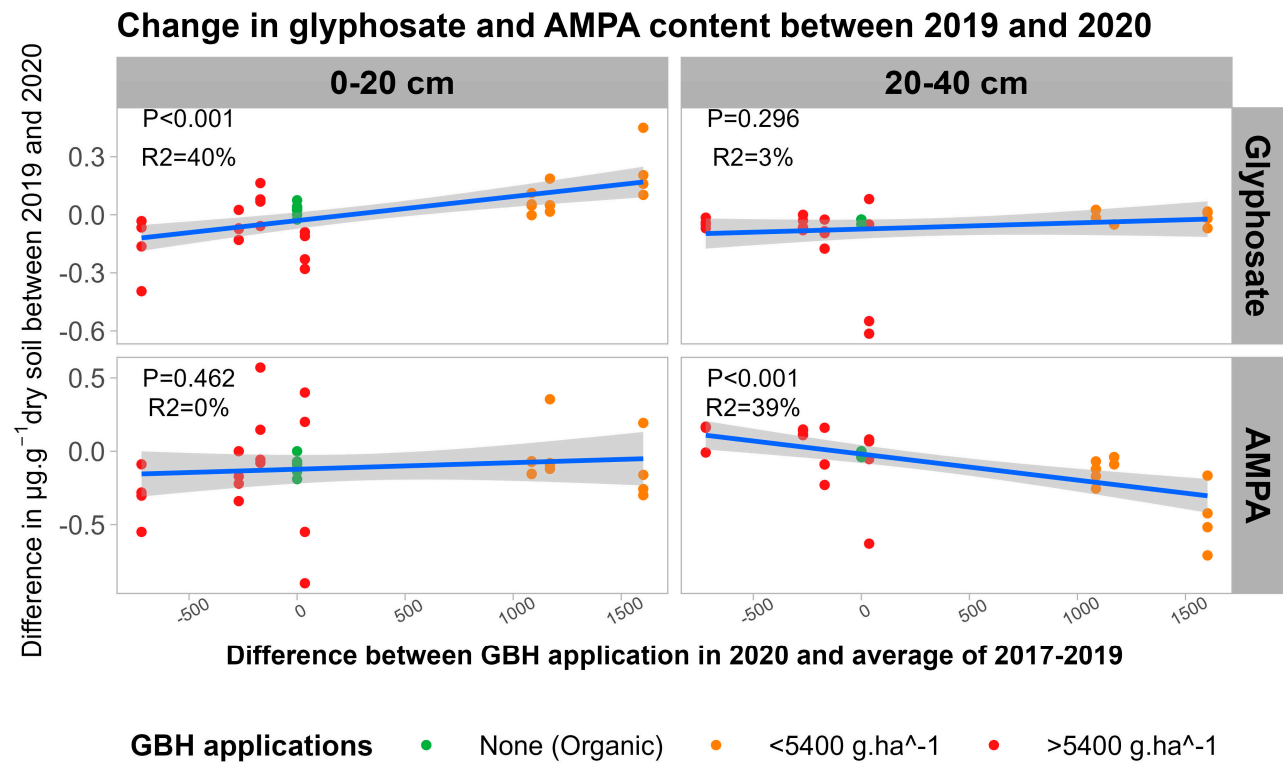

**Figure S1:** Correlation between difference in glyphosate (top) and AMPA (bottom) contents between 2019 and 2020 and the difference in GBH application in 2020 and the yearly average GBH application between 2017-2019.

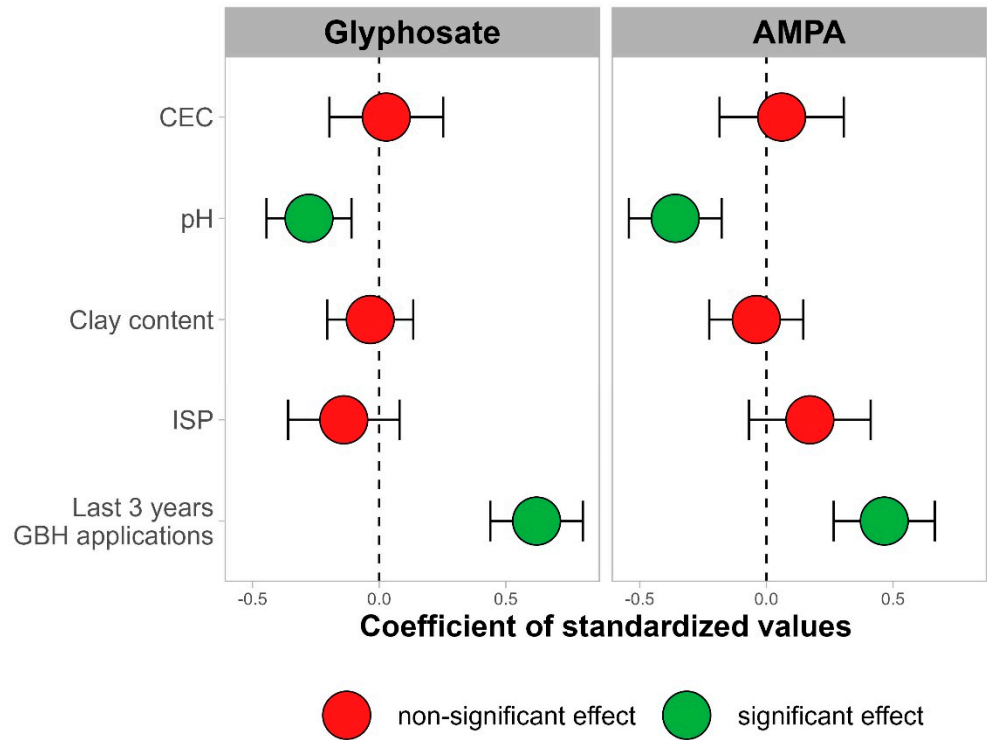

**Figure S2:** Coefficients values along with their 95% confidence interval for all independent variables in multiple regressions for AMPA (right) and glyphosate (left) content for 0-20 cm soil profile of all sites.

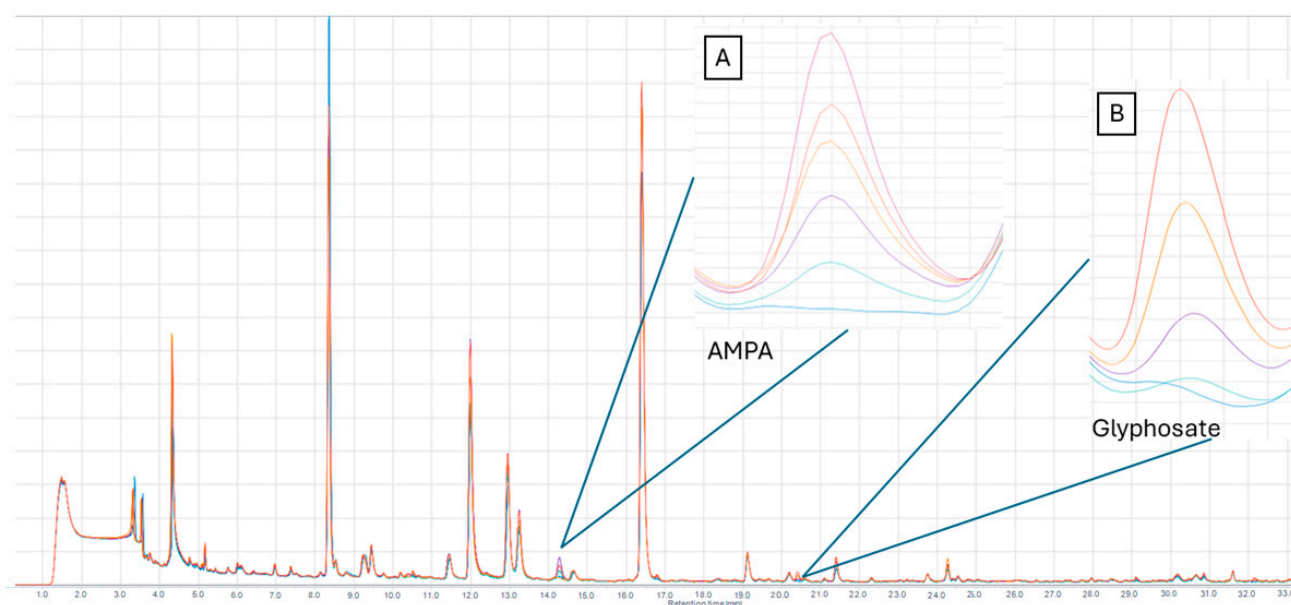

**Figure S3:** Chromatographs of a six-point calibration curve for AMPA (A) and a five point calibration curve for glyphosate (B) on a soil matrix.

**Supplemental Table S1:** Marginal effect of soil properties on microbial communities' composition for the 0-20 soil horizon.

| Variable       | Prokaryotic community |              | Fungal community |              | Eukaryotic community |              |
|----------------|-----------------------|--------------|------------------|--------------|----------------------|--------------|
|                | Pseudo-F value        | P-value      | Pseudo-F value   | P-value      | Pseudo-F value       | P-value      |
| pH             | 1.08                  | 0.325        | 1.12             | 0.243        | 0.874                | 0.591        |
| pH_SMP         | 1.03                  | 0.382        | 1.56             | <b>0.029</b> | 0.728                | 0.814        |
| Organic matter | 2.53                  | <b>0.005</b> | 1.53             | <b>0.028</b> | 1.98                 | <b>0.011</b> |
| P              | 0.734                 | 0.776        | 0.834            | 0.713        | 1.12                 | 0.312        |
| Al             | 0.865                 | 0.587        | 1.02             | 0.393        | 1.05                 | 0.371        |
| K              | 0.722                 | 0.816        | 1.07             | 0.334        | 0.749                | 0.777        |
| Ca             | 2.46                  | <b>0.009</b> | 1.57             | <b>0.027</b> | 1.81                 | <b>0.027</b> |
| Mg             | 1.33                  | 0.173        | 1.52             | <b>0.033</b> | 1.35                 | 0.145        |
| B              | 0.908                 | 0.530        | 1.33             | 0.073        | 1.20                 | 0.207        |
| Cu             | 0.973                 | 0.427        | 1.21             | 0.147        | 1.06                 | 0.351        |
| Fe             | 1.01                  | 0.389        | 1.11             | 0.269        | 1.12                 | 0.275        |

|              |       |              |      |              |      |              |
|--------------|-------|--------------|------|--------------|------|--------------|
| Mn           | 1.25  | 0.189        | 1.15 | 0.211        | 1.05 | 0.351        |
| Zn           | 0.706 | 0.805        | 1.28 | 0.107        | 1.12 | 0.284        |
| Na           | 2.49  | <b>0.001</b> | 2.06 | <b>0.001</b> | 2.15 | <b>0.011</b> |
| C            | 1.25  | 0.206        | 1.10 | <b>0.296</b> | 1.22 | 0.214        |
| N            | 1.34  | 0.164        | 1.42 | 0.059        | 1.25 | 0.191        |
| Clay content | 2.12  | <b>0.013</b> | 2.00 | <b>0.003</b> | 2.59 | <b>0.002</b> |
| Sand content | 1.80  | <b>0.033</b> | 1.78 | <b>0.005</b> | 2.06 | <b>0.014</b> |
